# Supplementary material
Source: Springer Nature journal article supplement (https://www.springermedizin.de/resource/supplementary/12978_2011_111_MOESM6_ESM.pdf/9602886)

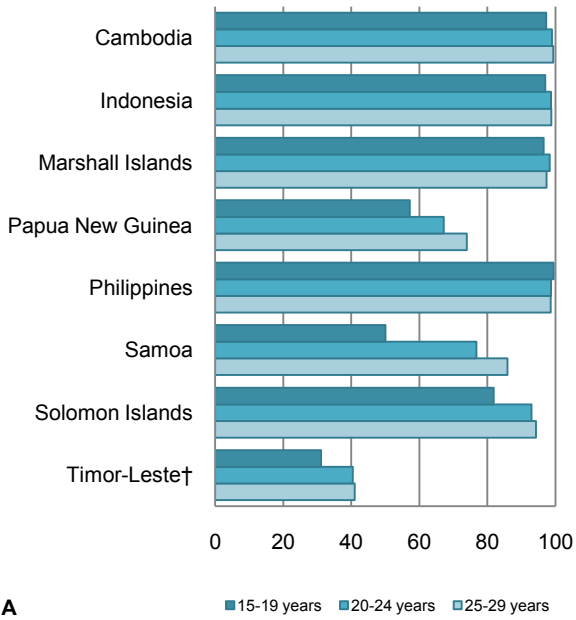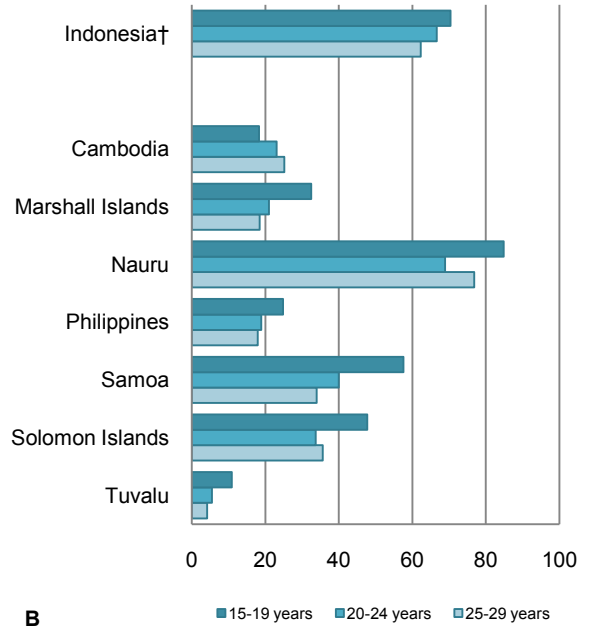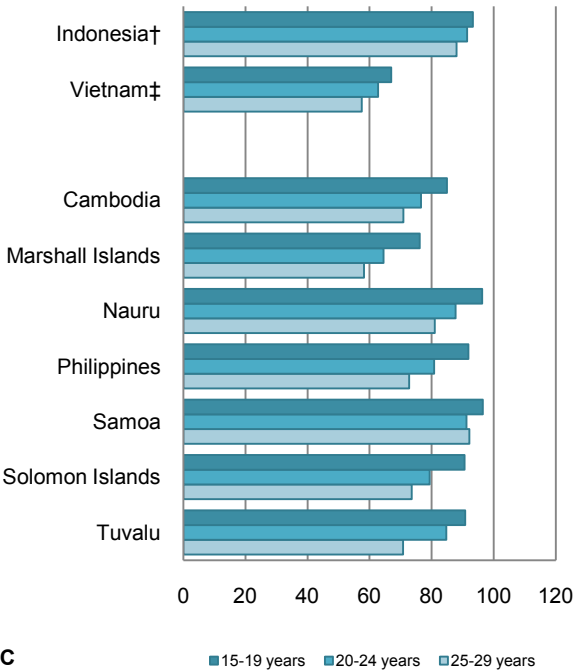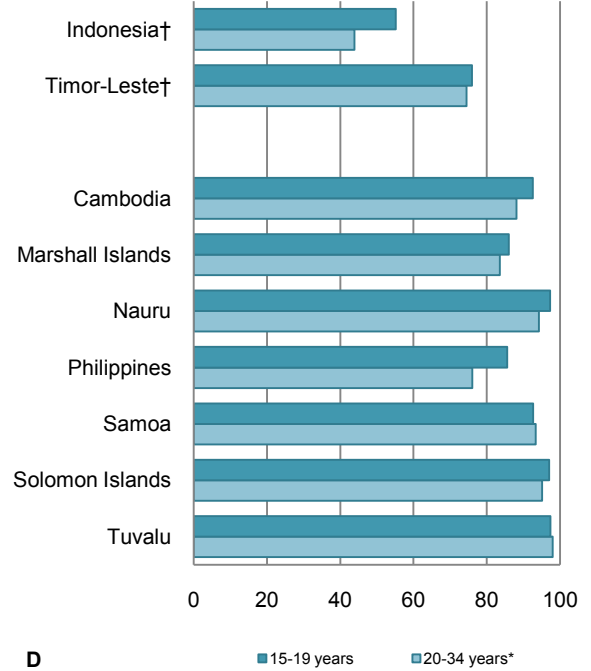

Supplement: MOESM6 [file 9602886]
